# Supplementary material for: Characterizing Adrenergic Regulation of Glucose Transporter 4-Mediated Glucose Uptake and Metabolism in the Heart
Source: PubMed Central journal article supplement — JACC Basic Transl Sci. 2023 Feb 22;8(6):638–55. doi: 10.1016/j.jacbts.2022.11.008 (PMC10322917; doi:10.1016/j.jacbts.2022.11.008), 2023-02-22

Supplemental Table 1. Echocardiogram of cardiac function at baseline and after adrenergic stimulation in  $\beta_2$ AR-flox and CKO mice.

|                          | Flox (baseline) | CKO (baseline) | Flox (ISO)       | CKO (ISO)       |
|--------------------------|-----------------|----------------|------------------|-----------------|
| EF %                     | 59.1 ± 0.81     | 58.9 ± 0.98    | 95.26 ± 0.61***  | 93.93 ± 0.90*** |
| FS %                     | 30.45 ± 0.50    | 30.54 ± 0.67   | 69.39 ± 1.43***  | 66.80 ± 1.94*** |
| IVS d (mm)               | 0.65 ± 0.026    | 0.66 ± 0.019   | 0.89 ± 0.018     | 0.94 ± 0.024    |
| IVS s (mm)               | 1.01 ± 0.019    | 1.03 ± 0.024   | 1.56 ± 0.041     | 1.71 ± 0.042    |
| LVID d (mm)              | 3.32 ± 0.11     | 3.58 ± 0.085   | 2.91 ± 0.046     | 3.08 ± 0.114    |
| LVID s (mm)              | 2.31 ± 0.088    | 2.49 ± 0.059   | 0.89 ± 0.045***  | 1.02 ± 0.073*** |
| LVPW d (mm)              | 0.747 ± 0.021   | 0.78 ± 0.028   | 0.86 ± 0.023     | 0.92 ± 0.058    |
| LVPW s (mm)              | 0.94 ± 0.031    | 1.02 ± 0.027   | 1.694 ± 0.028*** | 1.73 ± 0.092*** |
| LV mass (mg)             | 72.3 ± 3.56     | 80.1 ± 5.03    | 80.68 ± 2.09*    | 96.37 ± 6.21*   |
| LV mass (corrected) (mg) | 57.9 ± 2.87     | 64.1 ± 4.03    | 64.55 ± 1.67*    | 77.10 ± 4.97*   |
| LV Vol; d (μL)           | 48.02 ± 3.44    | 54.17 ± 3.04   | 32.44 ± 1.22***  | 37.59 ± 3.26*** |
| LV Vol; s (μL)           | 19.85 ± 1.65    | 22.21 ± 1.27   | 1.54 ± 0.21***   | 2.30 ± 0.43***  |
| HR (beats/min)           | 474 ± 4         | 477 ± 6        | 541 ± 9***       | 542 ± 11***     |

EF, ejection fraction, FS, fractional shortening, IVS d, interventricular septal end diastole; IVS s, interventricular septal end systole; LVID d, left ventricular internal diameter end diastole; LVID s, left ventricular internal diameter end systole; LVPW d, left ventricular posterior wall end diastole; LVPW s, left ventricular posterior wall end systole; LV mass, left ventricular mass; LV Vol d, left ventricular volume end diastole, LV Vol s, left ventricular volume end systole. Data represent mean ± SEM. N=8. \* $P < 0.05$  and \*\*\* $P < 0.001$ , vs baseline within the same colony group, respectively.  $P$  value determined by one-way ANOVA with Turkey post hoc test.

Supplemental Table 2. Hemodynamic parameters of  $\beta_2$ AR-flox and cKO working hearts.

| <b>Groups</b>              | <b>Flox</b>    |                 | <b>cKO</b>    |                |
|----------------------------|----------------|-----------------|---------------|----------------|
|                            | Vehicle        | ISO             | Vehicle       | ISO            |
| <b>Parameters</b>          |                |                 |               |                |
| HR (min <sup>-1</sup> )    | 225.80 ± 69.63 | 511.60 ± 74.05* | 334.80 ± 6.02 | 432.20 ± 6.53  |
| CF (ml min <sup>-1</sup> ) | 2.08 ± 1.17    | 0.46 ± 0.51*    | 2.48 ± 0.7    | 1.20 ± 1.06*#  |
| AF (ml min <sup>-1</sup> ) | 1.92 ± 1.17    | 3.56 ± 0.52*    | 1.52 ± 0.7    | 2.80 ± 1.06*#  |
| CO (ml min <sup>-1</sup> ) | 4.00 ± 0.01    | 4.02 ± 0.04     | 4.00 ± 0.01   | 4.00 ± 0.02    |
| LVDP (mm Hg)               | 28.68 ± 7.85   | 7.62 ± 2.31*    | 28.54 ± 4.56  | 12.94 ± 2.04*# |

HR, heart rate; CF, coronary flow; AF, aortic flow; CO, cardiac output. LVDP, left ventricle developed pressure. Data represent mean ± SEM. N = 4-6, \* $P < 0.05$  vs vehicle or isoproterenol group within the same colony group. # $P < 0.05$  vs the same condition in  $\beta_2$ AR-flox colony, respectively.  $P$  value determined by one-way ANOVA with Turkey post hoc test.

Supplemental Table 3. Echocardiogram of cardiac function at baseline and after adrenergic stimulation in WT and GRK-KI mice.

|                          | WT (baseline) | GRK KI (baseline) | WT (ISO)         | GRK-KI (ISO)     |
|--------------------------|---------------|-------------------|------------------|------------------|
| EF %                     | 57.10 ± 2.11  | 54.14 ± 2.40      | 95.08 ± 2.82***  | 93.46 ± 3.137*** |
| FS %                     | 29.42 ± 1.38  | 27.40 ± 1.47      | 70.31 ± 8.45***  | 66.54 ± 6.298*** |
| IVS d (mm)               | 0.77 ± 0.029  | 0.73 ± 0.041      | 0.666 ± 0.234    | 0.831 ± 0.087    |
| IVS s (mm)               | 1.18 ± 0.035  | 1.17 ± 0.019      | 1.159 ± 0.491    | 1.602 ± 0.289    |
| LVID d (mm)              | 3.61 ± 0.069  | 3.47 ± 0.059      | 2.358 ± 1.056    | 3.418 ± 0.182    |
| LVID s (mm)              | 2.52 ± 0.087  | 2.62 ± 0.059      | 1.001 ± 0.54*    | 1.146 ± 0.222*   |
| LVPW d (mm)              | 0.73 ± 0.035  | 0.73 ± 0.045      | 0.806 ± 0.375    | 0.647 ± 0.100    |
| LVPW s (mm)              | 1.03 ± 0.036  | 1.02 ± 0.054      | 1.477 ± 0.617    | 1.647 ± 0.188    |
| LV mass (mg)             | 95.71 ± 3.85  | 86.2 ± 7.98       | 91.08 ± 22.43    | 82.00 ± 13.39    |
| LV mass (corrected) (mg) | 76.57 ± 3.08  | 68.96 ± 6.38      | 62.86 ± 9.74     | 65.60 ± 10.72    |
| LV Vol; d (μL)           | 55.07 ± 2.56  | 49.88 ± 2.01      | 33.95 ± 8.956*   | 48.24 ± 6.032    |
| LV Vol; s (μL)           | 25.27 ± 1.90  | 24.09 ± 1.10      | 3.373 ± 3.059*** | 3.164 ± 1.398*** |
| HR (beats/min)           | 478 ± 4       | 482 ± 7           | 566 ± 29***      | 583 ± 30***      |

EF, ejection fraction, FS, fractional shortening, IVS d, interventricular septal end diastole; IVS s, interventricular septal end systole; LVID d, left ventricular internal diameter end diastole; LVID s, left ventricular internal diameter end systole; LVPW d, left ventricular posterior wall end diastole; LVPW s, left ventricular posterior wall end systole; LV mass, left ventricular mass; LV Vol d, left ventricular volume end diastole, LV Vol s, left ventricular volume end systole, Data represent mean ± SEM. N = 6-7. \* $P < 0.05$  and \*\*\* $P < 0.001$ , vs baseline within the same colony group, respectively.  $P$  value determined by one-way ANOVA with Turkey post hoc test.

Supplemental Table 4. Hemodynamic parameters of WT and GRK-mut working hearts.

| <b>Parameters</b>          | <b>WT</b>      |               | <b>GRK-mut KI</b> |                |
|----------------------------|----------------|---------------|-------------------|----------------|
|                            | Vehicle        | ISO           | Vehicle           | ISO            |
| HR (min <sup>-1</sup> )    | 261.32 ± 72.68 | 479.6 ± 77.8* | 283.3 ± 88.64     | 373.64 ± 81.17 |
| CF (ml min <sup>-1</sup> ) | 3.56 ± 0.22    | 2.98 ± 0.22*  | 2.92 ± 0.4        | 2.38 ± 0.36*   |
| AF (ml min <sup>-1</sup> ) | 0.46 ± 0.25    | 1.03 ± 0.26*  | 1.12 ± 0.43       | 1.65 ± 0.32*   |
| CO (ml min <sup>-1</sup> ) | 4.02 ± 0.06    | 4.01 ± 0.05   | 4.04 ± 0.09       | 4.03 ± 0.05    |
| LVDP (mm Hg)               | 26.8 ± 8.57    | 6.72 ± 1.32*  | 29.45 ± 3.51      | 14.31 ± 4.67*  |

HR, heart rate; CF, coronary flow; AF, aortic flow; CO, cardiac output. LVDP, left ventricle developed pressure. Data represent mean ± SEM. N = 4-6, \* $P < 0.05$  vs vehicle or isoproterenol group within the same colony group.  $P$  value determined by one-way ANOVA with Turkey post hoc test.

Supplemental Figure 1. Biochemical characterization of flox and  $\beta_2$ AR-CKO hearts. (A) Western blots showing the expression of Gi, PI3K-p85, GLUT4, GRK2, GRK5, and  $\beta$ arrestin2 expression in flox and  $\beta_2$ AR-CKO hearts. (B) The Western blots were quantified using ImageJ, and AUs were defined as the ratio of intensity of the protein of interest over the intensity of GAPDH. Data representing mean  $\pm$  SEM,  $n = 4$ . \* $P < 0.05$  and \*\* $P < 0.01$  were analyzed using Student's  $t$ -test.

Figure S1

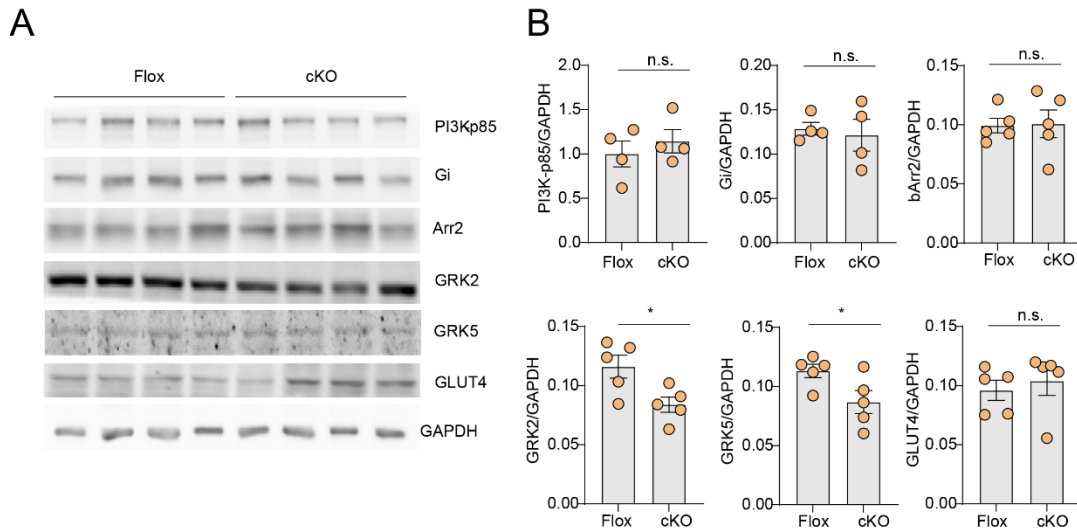

Supplemental Figure 2. Biochemical characterization of flox and  $\beta_2$ AR-CKO hearts. (A) Western blots showing the baseline phosphorylation of mTOR, PDK, AMPK, and AS160 in Flox and  $\beta_2$ AR-CKO hearts. (B) The Western blots were quantified using ImageJ, and AUs were defined as the ratio of phosphorylated PDK over the intensity of total PDK or as the ratio of phosphorylated mTOR, AMPK, and AS160 over the intensity of GAPDH. Data representing mean  $\pm$  SEM, n = 4. *P* values were analyzed using Student's *t*-test.

Supplemental Figure 3. Detection of ISO-induced Akt phosphorylation in flox and  $\beta_2$ AR-CKO AVMs. (A) Western blots showing phosphorylation of Akt at Ser473 and Ser474 mouse AVMs after stimulation with ISO (100 nM, 10 minutes). (B) The Western blots were quantified using ImageJ, and AUs were defined as the ratio of intensity of phosphorylated Akt over the intensity of total Akt. Data representing mean  $\pm$  SEM, n = 3. \**P* < 0.05 and \*\**P* < 0.01 were analyzed using two-way ANOVA with Tukey's multiple comparison test.

Figure S2

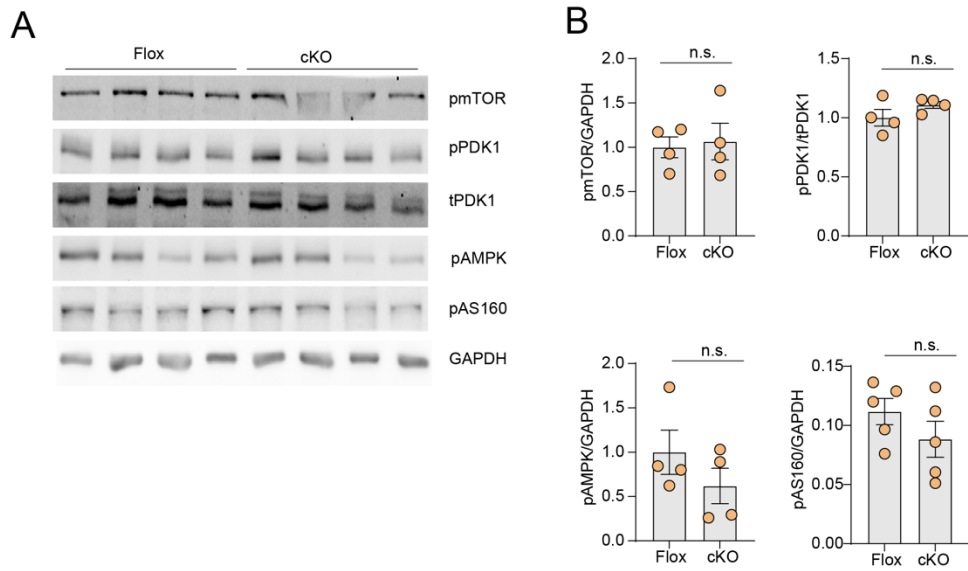

Figure S3

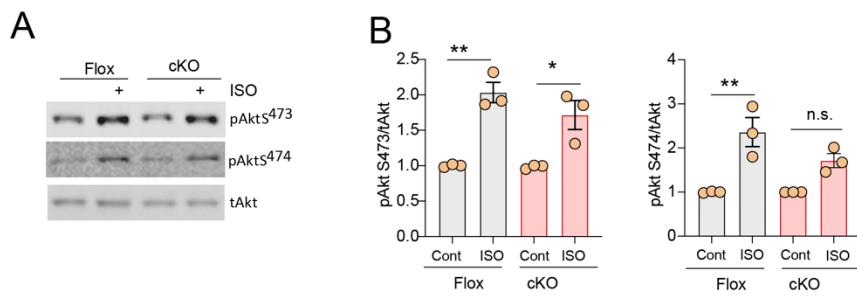

Supplemental Figure 4. Characterization of WT and GRK-mut  $\beta_2$ AR expressing in  $\beta_2$ AR-CKO AVMs. (A-B)  $\beta_2$ AR-CKO myocytes expressing either WT or GRK-mut  $\beta_2$ AR, the expression of the receptor was quantified. Data representing mean  $\pm$  SEM of individual cells from 3 isolations. \* $P < 0.05$  were analyzed using Student's *t*-test.

Supplemental Figure 5. Biochemical characterization of WT and GRK-mut hearts. (A-B) Western blots showing the expression of Gi, PI3K-p85, GLUT4, GRK2, GRK5, and  $\beta$ arrestin2 expression in WT and GRK-mut hearts. (C-D) Western blots showing the baseline phosphorylation of Akt and AS160 in WT and GRK-mut hearts. The Western blots were quantified using ImageJ, and AUs were defined as the ratio of phosphorylated Akt over the intensity of total Akt or as the ratio of the protein intensity over the intensity of GAPDH. Data representing mean  $\pm$  SEM, n = 4. \* $P < 0.05$  were analyzed using Student's *t*-test.



Figure S4

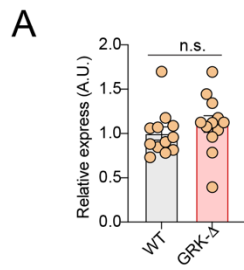

Figure S5

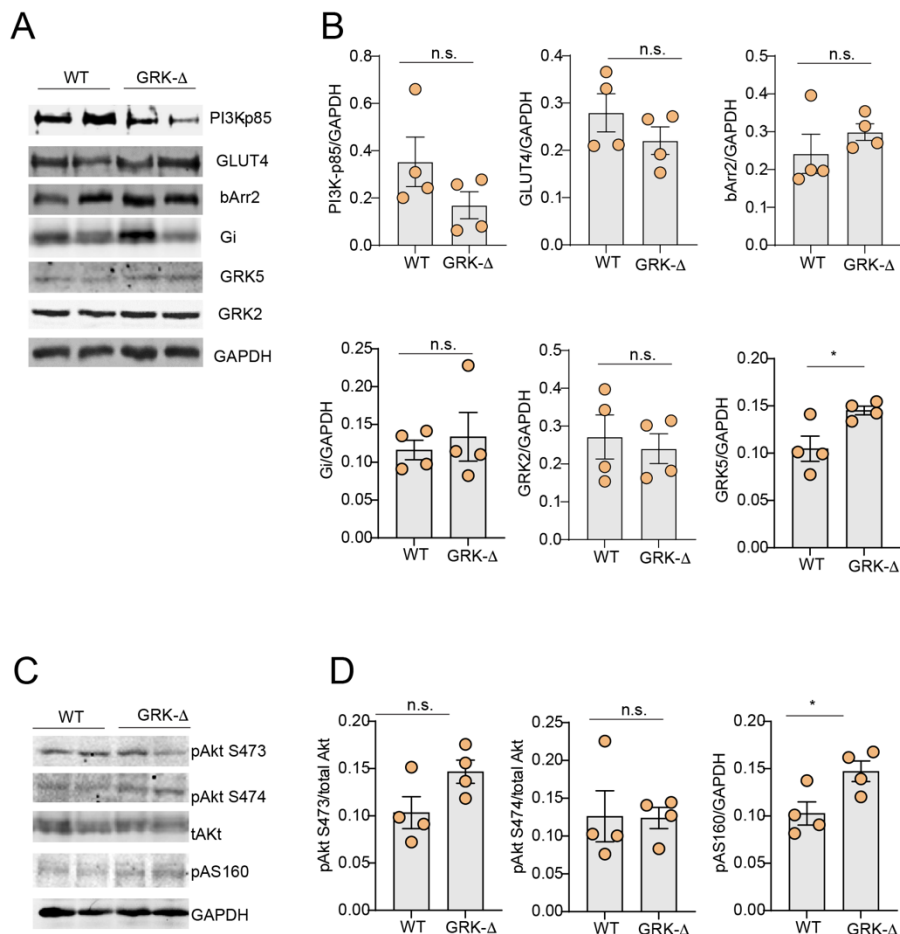

Supplement: mmc1.pdf [file mmc1.pdf]
